# Supplementary material for: The application of No Barrier Theory to the aldol addition reaction
Source: Royal Society of Chemistry journal article supplement (doi:10.1039/b906718c), 2009-10-21
Supplement: b906718c.pdf [file b906718c.pdf]

# The Application of No Barrier Theory to the Aldol Addition Reaction

J. Peter Guthrie\*, Alexander R. Bannister, and Sriyawathie Peiris

Department of Chemistry, University of Western Ontario,  
London, Ontario, Canada N6A 5B7

Supporting Information.

1. Structures of the reactants and products in Z-matrix format.
2. Distortion energies for all reactions.

1. Structures of the reactants and products in Z-matrix format.

a. enolates

acetaldehyde enolate

```
%chk=/scratch/pguthrie/enolal
%rwf=/scratch/pguthrie/enolal
%nosave
#T pm6 POpt Test
```

enolal

```
-1 1
C
H 1 R2
H 1 R3 2 A3
C 1 R4 2 A4 3 D4
O 4 R5 1 A5 2 D5
H 4 R6 1 A6 2 D6
```

Variables:

```
R2 = 1.06215
R3 = 1.05827
A3 = 115.00397
R4 = 1.36955
A4 = 121.73643
D4 = -180.00002
R5 = 1.26513
A5 = 127.98124
D5 = 0.00000
R6 = 1.11057
A6 = 117.44091
D6 = -180.00002
```

acetone enolate

```
%chk=/scratch/pguthrie/enolao
%rwf=/scratch/pguthrie/enolao
%nosave
#T pm6 POpt Test
```

acetoneenolate

```
-1 1
C
```

```
C 1 R2
C 2 R3 1 A3
O 2 R4 1 A4 3 D4
H 1 R5 2 A5 3 D5
H 1 R6 2 A6 3 D6
H 3 R7 2 A7 1 D7
H 3 R8 2 A8 1 D8
H 3 R9 2 A9 1 D9
```

Variables:

```
R2 = 1.36874
R3 = 1.55221
A3 = 117.92410
R4 = 1.25737
A4 = 127.93846
D4 = 180.00002
R5 = 1.05709
A5 = 123.93339
D5 = 0.00000
R6 = 1.06166
A6 = 120.94179
D6 = -180.00002
R7 = 1.08544
A7 = 112.08395
D7 = -0.02798
R8 = 1.08869
A8 = 108.58824
D8 = 121.15556
R9 = 1.08868
A9 = 108.58446
D9 = -121.20984
```

acetophenone enolate

```
%chk=/scratch/pguthrie/enolap
%rwf=/scratch/pguthrie/enolap
%nosave
#P PM6 POpt Test
```

enolap.mop

```
-1 1
C
C 1 R2
C 2 R3 1 A3
C 3 R4 2 A4 1 D4
C 3 R5 2 A5 1 D5
```

C 5 R6 3 A6 2 D6  
C 6 R7 5 A7 3 D7  
C 4 R8 3 A8 2 D8  
H 4 R9 3 A9 2 D9  
H 5 R10 3 A10 2 D10  
H 6 R11 5 A11 3 D11  
H 7 R12 6 A12 5 D12  
H 8 R13 4 A13 3 D13  
O 2 R14 1 A14 3 D14  
H 1 R15 2 A15 3 D15  
H 1 R16 2 A16 3 D16

Variables:

R2 = 1.365  
R3 = 1.540  
A3 = 116.271  
R4 = 1.402  
A4 = 119.674  
D4 = 127.852  
R5 = 1.401  
A5 = 121.090  
D5 = -52.904  
R6 = 1.398  
A6 = 120.395  
D6 = -179.736  
R7 = 1.399  
A7 = 120.141  
D7 = -0.031  
R8 = 1.397  
A8 = 120.452  
D8 = 179.968  
R9 = 1.089  
A9 = 118.537  
D9 = 0.970  
R10 = 1.088  
A10 = 119.014  
D10 = 0.398  
R11 = 1.085  
A11 = 119.906  
D11 = 179.977  
R12 = 1.083  
A12 = 120.192  
D12 = -179.873  
R13 = 1.085  
A13 = 119.967  
D13 = 179.895  
R14 = 1.254

A14 = 129.369  
D14 = 179.180  
R15 = 1.060  
A15 = 123.984  
D15 = -0.321  
R16 = 1.064  
A16 = 120.849  
D16 = -179.432

b. carbonyl compounds

formaldehyde

```
%chk=/scratch/pguthrie/form  
%rwf=/scratch/pguthrie/form  
%nosave  
#P PM6 POpt Test
```

form.mop

```
0 1  
O  
C 1 R2  
H 2 R3 1 A3  
H 2 R4 1 A4 3 D4  
Variables:  
R2 = 1.211  
R3 = 1.097  
A3 = 122.017  
R4 = 1.097  
A4 = 122.008  
D4 = -180.000
```

acetaldehyde

```
%chk=/scratch/pguthrie/al  
%rwf=/scratch/pguthrie/al  
%nosave  
#P PM6 POpt Test
```

al.mop

```
0 1  
C  
C 1 R2  
O 2 R3 1 A3
```

H 1 R4 2 A4 3 D4  
H 1 R5 2 A5 3 D5  
H 1 R6 2 A6 3 D6  
H 2 R7 1 A7 4 D7

Variables:

R2 = 1.500  
R3 = 1.210  
A3 = 122.739  
R4 = 1.101  
A4 = 111.744  
D4 = 0.073  
R5 = 1.098  
A5 = 111.648  
D5 = -119.913  
R6 = 1.098  
A6 = 111.641  
D6 = 120.053  
R7 = 1.102  
A7 = 115.482  
D7 = -179.924

benzaldehyde

%chk=/scratch/pguthrie/bl  
%rwf=/scratch/pguthrie/bl  
%nosave  
#T pm6 POpt Test

bl

0 1  
C  
C 1 R2  
C 2 R3 1 A3  
C 3 R4 2 A4 1 D4  
C 4 R5 3 A5 2 D5  
C 1 R6 2 A6 3 D6  
C 3 R7 2 A7 1 D7  
H 7 R8 3 A8 2 D8  
H 1 R9 2 A9 3 D9  
H 2 R10 1 A10 6 D10  
H 4 R11 3 A11 2 D11  
H 5 R12 4 A12 3 D12  
H 6 R13 1 A13 2 D13  
O 7 R14 3 A14 2 D14

Variables:

R2 = 1.39743  
R3 = 1.40260  
A3 = 120.04217  
R4 = 1.40339  
A4 = 119.93675  
D4 = 0.00000  
R5 = 1.39609  
A5 = 119.89762  
D5 = 0.00000  
R6 = 1.39807  
A6 = 119.88757  
D6 = 0.00000  
R7 = 1.48916  
A7 = 119.77193  
D7 = 180.00002  
R8 = 1.10267  
A8 = 115.90584  
D8 = 180.00002  
R9 = 1.08903  
A9 = 119.97026  
D9 = -180.00002  
R10 = 1.09403  
A10 = 120.84109  
D10 = -180.00002  
R11 = 1.08990  
A11 = 120.26821  
D11 = -180.00002  
R12 = 1.08879  
A12 = 120.06918  
D12 = -180.00002  
R13 = 1.09003  
A13 = 119.96366  
D13 = -180.00002  
R14 = 1.21302  
A14 = 122.74567  
D14 = 0.00000

acetone

%chk=/scratch/pguthrie/ao  
%rwf=/scratch/pguthrie/ao  
%nosave  
#T pm6 POpt Test

ao

```
0 1
C
C 1 R2
C 2 R3 1 A3
O 2 R4 1 A4 3 D4
H 1 R5 2 A5 3 D5
H 1 R6 2 A6 3 D6
H 1 R7 2 A7 3 D7
H 3 R8 2 A8 1 D8
H 3 R9 2 A9 1 D9
H 3 R10 2 A10 1 D10
```

Variables:

```
R2 = 1.50371
R3 = 1.50341
A3 = 115.80209
R4 = 1.20959
A4 = 122.04448
D4 = -180.00002
R5 = 1.10031
A5 = 111.23029
D5 = -180.00002
R6 = 1.09705
A6 = 111.79154
D6 = 60.12611
R7 = 1.09707
A7 = 111.79822
D7 = -60.10917
R8 = 1.10037
A8 = 111.25677
D8 = 180.00002
R9 = 1.09714
A9 = 111.78433
D9 = -60.12138
R10 = 1.09715
A10 = 111.79194
D10 = 60.09335
```

acetophenone

```
%chk=/scratch/pguthrie/ap
%rwf=/scratch/pguthrie/ap
%nosave
#P PM6 POpt Test
```

ap.mop



0 1  
 C  
 O 1 R2  
 C 1 R3 2 A3  
 H 3 R4 1 A4 2 D4  
 H 3 R5 1 A5 2 D5  
 H 3 R6 1 A6 2 D6  
 C 1 R7 2 A7 3 D7  
 C 7 R8 1 A8 2 D8  
 C 8 R9 7 A9 1 D9  
 C 9 R10 8 A10 7 D10  
 C 10 R11 9 A11 8 D11  
 C 7 R12 1 A12 2 D12  
 H 8 R13 7 A13 1 D13  
 H 9 R14 8 A14 7 D14  
 H 10 R15 9 A15 8 D15  
 H 11 R16 10 A16 9 D16  
 H 12 R17 7 A17 1 D17

Variables:

R2 = 1.214  
 R3 = 1.502  
 A3 = 120.941  
 R4 = 1.097  
 A4 = 111.998  
 D4 = -119.389  
 R5 = 1.097  
 A5 = 111.973  
 D5 = 119.128  
 R6 = 1.102  
 A6 = 110.450  
 D6 = -0.116  
 R7 = 1.497  
 A7 = 120.963  
 D7 = -179.995  
 R8 = 1.405  
 A8 = 117.682  
 D8 = 0.122  
 R9 = 1.396  
 A9 = 120.339  
 D9 = -179.984  
 R10 = 1.398  
 A10 = 119.869  
 D10 = 0.009  
 R11 = 1.399  
 A11 = 120.056  
 D11 = -0.009

R12 = 1.402  
A12 = 122.806  
D12 = -179.848  
R13 = 1.095  
A13 = 119.046  
D13 = 0.025  
R14 = 1.089  
A14 = 120.003  
D14 = -179.993  
R15 = 1.090  
A15 = 119.980  
D15 = 179.988  
R16 = 1.089  
A16 = 119.955  
D16 = 179.998  
R17 = 1.090  
A17 = 120.592  
D17 = -0.033

trifluoroacetophenone

%chk=/scratch/pguthrie/tfap  
%rwf=/scratch/pguthrie/tfap  
%nosave  
#P PM6 POpt Test

tfap.mop

0 1  
C  
O 1 R2  
C 1 R3 2 A3  
F 3 R4 1 A4 2 D4  
F 3 R5 1 A5 2 D5  
F 3 R6 1 A6 2 D6  
C 1 R7 2 A7 3 D7  
C 7 R8 1 A8 2 D8  
C 8 R9 7 A9 1 D9  
C 9 R10 8 A10 7 D10  
C 10 R11 9 A11 8 D11  
C 7 R12 1 A12 2 D12  
H 8 R13 7 A13 1 D13  
H 9 R14 8 A14 7 D14  
H 10 R15 9 A15 8 D15  
H 11 R16 10 A16 9 D16  
H 12 R17 7 A17 1 D17

Variables:

R2 = 1.204  
R3 = 1.568  
A3 = 115.832  
R4 = 1.340  
A4 = 114.941  
D4 = -119.111  
R5 = 1.340  
A5 = 114.914  
D5 = 118.870  
R6 = 1.337  
A6 = 111.872  
D6 = -0.103  
R7 = 1.476  
A7 = 125.146  
D7 = 179.979  
R8 = 1.411  
A8 = 116.127  
D8 = 0.062  
R9 = 1.394  
A9 = 120.383  
D9 = -179.951  
R10 = 1.400  
A10 = 119.860  
D10 = -0.005  
R11 = 1.398  
A11 = 120.039  
D11 = -0.014  
R12 = 1.403  
A12 = 124.414  
D12 = -179.897  
R13 = 1.095  
A13 = 119.253  
D13 = 0.044  
R14 = 1.090  
A14 = 120.037  
D14 = 179.999  
R15 = 1.091  
A15 = 119.971  
D15 = 179.994  
R16 = 1.090  
A16 = 119.947  
D16 = 179.999  
R17 = 1.090  
A17 = 121.784  
D17 = -0.048

## 2. Distortion energies for all reactions.

For the aldol additions studied there is no energy difference between reactive conformation and equilibrium conformation for the enolate, but there generally is for the product. This energy difference was calculated as described in the text.

### Distortions for addition of acetone enolate to six carbonyl compounds.

| Corner | formaldehyde | acetaldehyde | benzaldehyde | acetone | acetophenone | trifluoroacetophenone |
|--------|--------------|--------------|--------------|---------|--------------|-----------------------|
| 000    | 0.000        | 0.000        | 0.000        | 0.000   | 0.000        | 0.000                 |
| 100    | 49.461       | 61.105       | 53.203       | 82.057  | 84.467       | 101.709               |
| 010    | 28.197       | 29.882       | 26.928       | 34.430  | 34.625       | 33.505                |
| 001    | 6.07         | 6.08         | 6.26         | 6.37    | 6.68         | 7.14                  |
| 110    | 22.209       | 22.014       | 10.815       | 23.899  | 22.219       | 30.026                |
| 101    | 29.816       | 36.757       | 27.473       | 41.340  | 35.645       | 44.942                |
| 011    | 34.27        | 35.96        | 33.19        | 40.80   | 41.31        | 40.65                 |
| 111    | 1.542        | 1.565        | 8.485        | 2.750   | 5.479        | 7.042                 |

### Distortions for addition of acetone enolate to six carbonyl compounds.

| Corner | formaldehyde | acetaldehyde | benzaldehyde | acetone | acetophenone | trifluoroacetophenone |
|--------|--------------|--------------|--------------|---------|--------------|-----------------------|
| 000    | 0.000        | 0.000        | 0.000        | 0.000   | 0.000        | 0.000                 |
| 100    | 67.151       | 62.365       | 57.939       | 87.945  | 84.288       | 106.869               |
| 010    | 28.567       | 28.625       | 27.541       | 32.696  | 32.268       | 31.462                |
| 001    | 6.53         | 6.40         | 6.58         | 6.20    | 7.74         | 7.19                  |
| 110    | 20.953       | 24.088       | 24.924       | 25.047  | 23.659       | 31.572                |
| 101    | 28.956       | 30.440       | 27.734       | 48.121  | 39.404       | 56.523                |
| 011    | 35.1         | 35.03        | 34.12        | 38.90   | 40.01        | 38.65                 |
| 111    | 1.903        | 7.869        | 8.797        | 2.203   | 5.204        | 5.751                 |

Distortions for addition of acetophenone enolate to six carbonyl compounds.

| Corner | formaldehyde | acetaldehyde | benzaldehyde | acetone | acetophenone | trifluoroacetophenone |
|--------|--------------|--------------|--------------|---------|--------------|-----------------------|
| 000    | 0.000        | 0.000        | 0.000        | 0.000   | 0.000        | 0.000                 |
| 100    | 55.388       | 65.618       | 55.926       | 85.600  | 03.256       | 104.409               |
| 010    | 27.754       | 29.281       | 28.175       | 33.029  | 29.448       | 31.372                |
| 001    | 7.76         | 7.66         | 6.07         | 7.58    | 5.42         | 6.40                  |
| 110    | 26.236       | 25.989       | 23.796       | 27.962  | 24.294       | 32.706                |
| 101    | 37.231       | 39.441       | 21.405       | 52.897  | 33.053       | 54.893                |
| 011    | 35.51        | 36.94        | 34.25        | 40.61   | 34.87        | 37.77                 |
| 111    | 0.000        | 0.737        | 10.401       | 1.168   | 1.310        | 1.911                 |
